# Supplementary material for: Melatonin relieves heat-induced spermatocyte apoptosis in mouse testes by inhibition of ATF6 and PERK signaling pathways
Source: PubMed Central journal article supplement — Zool Res. 2021 Jul 18;42(4):514–24. doi: 10.24272/j.issn.2095-8137.2021.041 (PMC8317181; doi:10.24272/j.issn.2095-8137.2021.041), 2021-07-18
Supplement: zr-42-4-514-S1.pdf [file zr-42-4-514-S1.pdf]

## Supplementary Figures and Tables

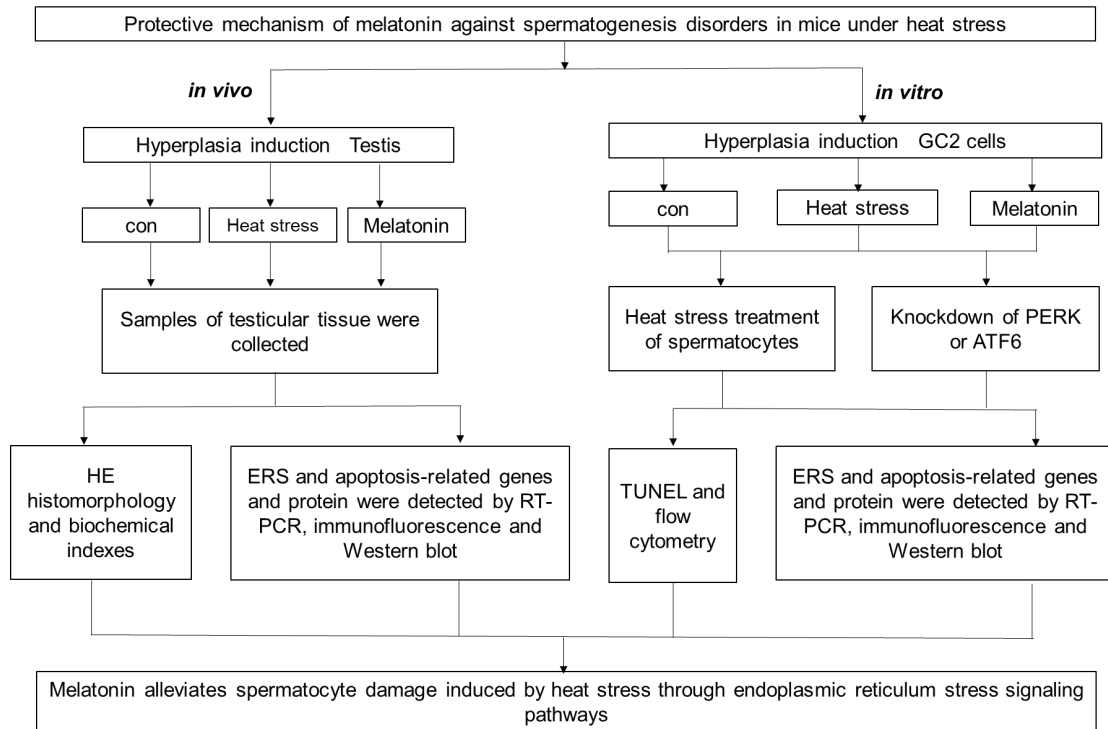

Supplementary Figure S1. Diagram describing methodologies used in the current study.

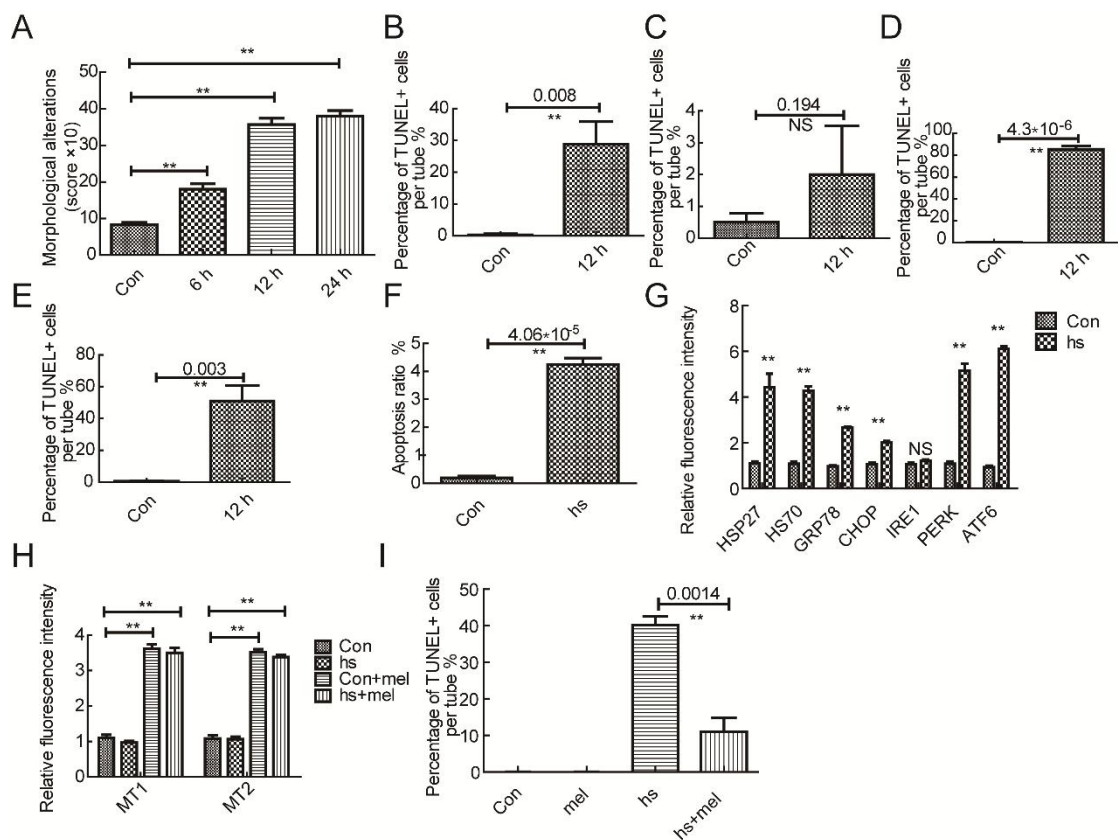

Supplementary Figure S2. (A) Semi-quantitative analysis of seminiferous tubes in Figure 1A. (B) Quantification of percentage of TUNEL+ cells per tube. (C) Quantification of percentage of IRE1+ cells per tube. (D) Quantification of percentage of PERK+ cells per tube. (E) Quantification of percentage of ATF6+ cells per tube. (F) Quantification of percentage of apoptosis-positive cells per tube. (G) Quantification of relative fluorescence intensity of positive cells. From left to right, HSP27, HSP70, GRP78, CHOP, IRE1, PERK, and ATF6. (H) Quantification of expression of melatonin receptors. (I) Quantification of percentage of TUNEL+ cells per tube. Con: Control, hs: Heat stress, mel: melatonin. Data are mean $\pm$ SD (n=3); statistical significance is expressed as: \*\* $P$ <0.01, NS, not significant.

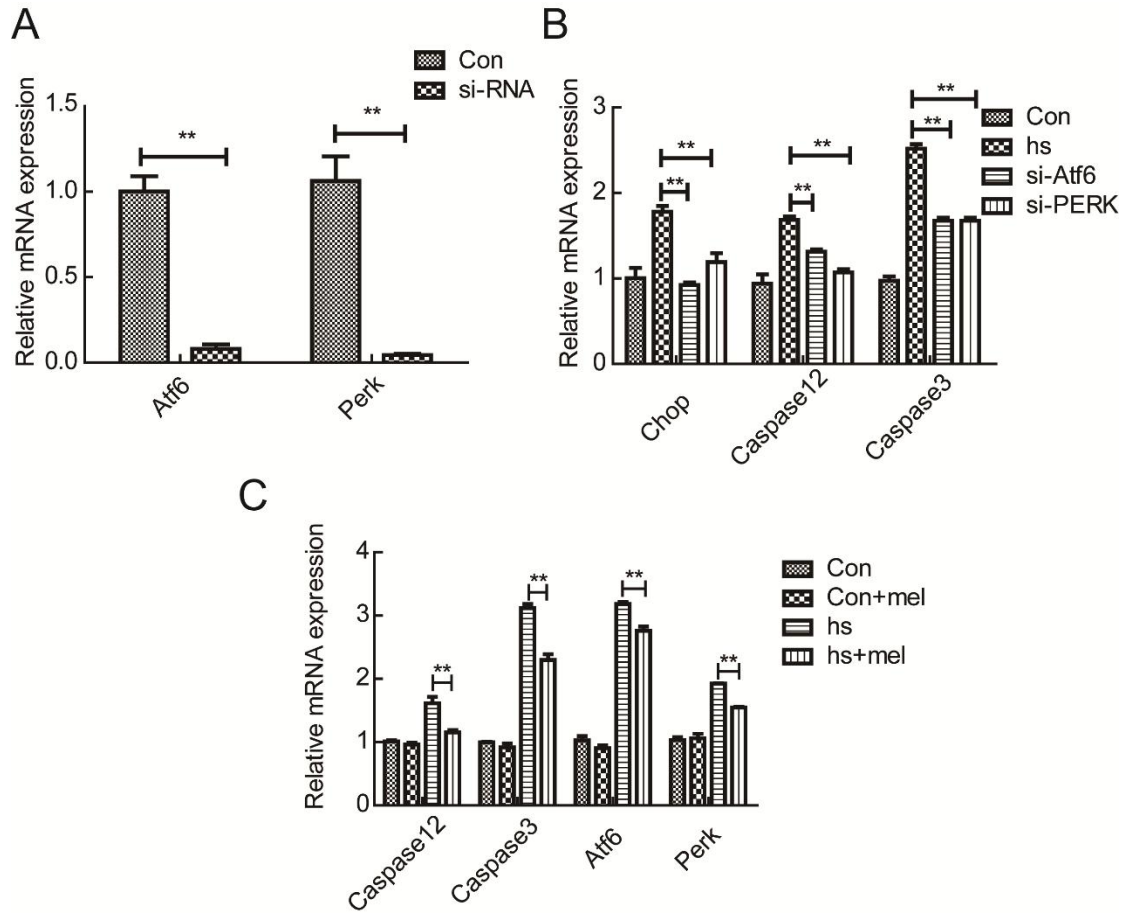

Supplementary Figure S3. qRT-PCR of ERS- (*Perk* and *Atf6*) and apoptosis-related genes (*Caspase3*, *Caspase12*, and *Chop*) in  $10^{-6}$   $\mu$ M melatonin-treated spermatocytes 4 h after heat treatment. (B) qRT-PCR of apoptosis-related genes (*Caspase12*, *Caspase3*, and *Chop*) in si-*Perk* and si-ATF6 cell lines 4 h after heat treatment for 2 h. (C) qRT-PCR of *Perk* and *Atf6* mRNA expression levels in si-*Perk* and si-ATF6 cell lines. Con: Control, hs: Heat stress, mel: melatonin. Data are mean $\pm$ SD (n=3); statistical significance is expressed as: \*\* $P$ <0.01.

| <b>Gene name</b>   | <b>Forward primer (5'–3')</b> | <b>Reverse primer (5'–3')</b> |
|--------------------|-------------------------------|-------------------------------|
| <b>m-Grp78</b>     | AGGGCAACCGCATCACG             | CGCATCGCCAATCAGACG            |
| <b>m-Atf6</b>      | AACCAGGGATACGTGGGACC          | CCACAGGTCCTCTTTAGGCTT         |
| <b>m-Perk</b>      | AGGCTTTAACTTCCCGCATT          | AGTGCCAGACTGAAAGTAAATACG      |
| <b>m-Ire1</b>      | GCATAGTCAAAGTAGGTGGCA         | GATAGTCTCTGCCCATCAACC         |
| <b>m-Caspase12</b> | CTGGCTCTCATCATCTGCAACAA       | CGGCCAGCAAACCTGCATTAAC        |
| <b>m-Caspase3</b>  | GTCTGACTGGAAAGCCGAAAC         | GACTGGATGAACCACGACCC          |
| <b>m-Chop</b>      | GAACAGTGGGCATCACCTC           | CAGTCCCCTCCTCAGCAT            |
| <b>m-β-Actin</b>   | GTACCCAGGCATTGCTGACA          | CGCAGCTCAGTAACAGTCCG          |
| <b>m-Gapdh</b>     | TGGCCTTCCGTGTTCTTAC           | GAGTTGCTGTTGAAGTCGCA          |
| <b>m- Hsp70</b>    | GGCAGTACTTGGGATCAGGG          | TCCACATCTTCTCCGAAGCG          |
| <b>m- Hsp27</b>    | CGAGGAGGTGGATTAGAGGC          | ACAGTGCTGCTCCCAACATT          |

Supplementary Table S1. Primer sequences and gene numbers used in this study

Supplementary Table S2. Antibodies and dilutions used in western blotting and

| <b>Antibody</b> | <b>Catalog no.</b> | <b>Corporate brand</b> | <b>Dilution</b> | <b>Immunosourcer</b> |
|-----------------|--------------------|------------------------|-----------------|----------------------|
| C-Caspase12     | 55238-1-AP         | Proteintech Group      | 1:400           | Rabbit IgG           |
| C-Caspase3      | bs-0081R           | Beijing Biosynthesis   | 1:400           | Rabbit IgG           |
| CHOP            | 15204-1-AP         | Proteintech Group      | 1:300           | Rabbit IgG           |
| p-PERK          | bs-3330R           | Beijing Biosynthesis   | 1:500           | Rabbit IgG           |
| p-IRE1 $\alpha$ | bs-4308R           | Beijing Biosynthesis   | 1:500           | Rabbit IgG           |
| ATF 6           | 24169-1-AP         | Proteintech Group      | 1:500           | Rabbit IgG           |
| MT1             | bs-0027R           | Beijing Biosynthesis   | 1:200           | Rabbit IgG           |
| MT2             | bs-0963R           | Beijing Biosynthesis   | 1:200           | Rabbit IgG           |
| HSP70           | bs-0244R           | Beijing Biosynthesis   | 1:500           | Rabbit IgG           |
| HSP27           | bs-0730R           | Beijing Biosynthesis   | 1:500           | Rabbit IgG           |
| GRP78           | WL00621            | Wanlei Biotechnology   | 1:1000          | Rabbit IgG           |
| BOULE           | 13720-1-AP         | Proteintech Group      | 1:500           | Rabbit IgG           |
| GAPDH           | ZL9002             | Beijing Jisi Jiayang   | 1:4000          | Mouse IgG            |

immunofluorescence
